# Supplementary material for: The great betrayal Fraud in science
Source: JCI journal article supplement (doi:10.1172/jci24343), 2005-02-01
Supplement: sd1 [file 1]

1. Judson, H.C. 1996. *The eighth day of creation: makers of the revolution in biology*. Cold Spring Harbor Laboratory Press. New York, New York, USA. 714 pp.
2. Broad, W., and Wade, N. 1983. *Betrayers of the truth*. Simon and Schuster. New York, New York, USA. 256 pp.
3. Kohn, A. 1986. *False prophets*. B. Blackwell. New York, New York, USA/Oxford, United Kingdom. 226 pp.
4. Office of Research Integrity. 2004. Handling misconduct. Case studies. <http://ori.dhhs.gov/html/misconduct/casesummaries.asp>.
5. Office of Research Integrity. 2004. Handling misconduct. Preliminary Assessment. Assessing Scientific Misconduct Allegations Involving Clinical Research. [http://ori.hhs.gov/html/misconduct/assessing\\_scientific\\_misconduct\\_allegations.asp](http://ori.hhs.gov/html/misconduct/assessing_scientific_misconduct_allegations.asp).
6. Sarasohn, J. 1993. *Science on trial: the whistle blower, the accused, and the Nobel Laureate*. St. Martins Press. New York, New York, USA. 294 pp.
7. Kevles, D.J. 1998. *The Baltimore case: a trial of politics, science, and character*. W.W. Norton and Company. New York, New York, USA. 509 pp.
